# Supplementary material
Source: MDPI journal article supplement (https://www.mdpi.com/1999-4907/15/2/242)
Supplement: s1 [file s1]

# The Changes in Soil Microbial Communities and Assembly Processes along Vegetation Succession in a Subtropical Forest

Jiusheng Ren <sup>1,†</sup>, Kangxiang Huang <sup>2,†</sup>, Fangfang Xu <sup>1,2</sup>, Yuan Zhang <sup>2</sup>, Bosen Yuan <sup>2</sup>, Huimin Chen <sup>3</sup> and Fuxi Shi <sup>2,4,\*</sup>

<sup>1</sup> School of Water Resources and Environmental Engineering/Jiangxi Province Key Laboratory of the Causes and Control of Atmospheric Pollution, East China University of Technology, Nanchang 330013, China; renjiusheng256@ecut.edu.cn (J.R.); xufangfang@stu.jxau.edu.cn (F.X.)

<sup>2</sup> Key Laboratory of National Forestry and Grassland Administration on Forest Ecosystem Protection and Restoration of Poyang Lake Watershed, College of Forestry, Jiangxi Agricultural University, Nanchang 330045, China; [hkx2021@stu.jxau.edu.cn](mailto:hkx2021@stu.jxau.edu.cn) (K.H.); 15934791433@stu.jxau.edu.cn (Y.Z.); yuan476147253@jxau.edu.cn (B.Y.)

<sup>3</sup> Jiangxi Agricultural University Library, Jiangxi Agricultural University, Nanchang 330045, China; [chenhm292@163.com](mailto:chenhm292@163.com) (H.C.)

<sup>4</sup> Matoushan Observation and Research Station of Forest Ecosystem, Zixi, Fuzhou 335300, China

\* Correspondence: [shifuxi@jxau.edu.cn](mailto:shifuxi@jxau.edu.cn)

† These authors contributed equally to this work.

## Appendix A. Supplementary data

**Table S1** Soil physical and chemical characteristics from Abandoned lands (AL), Deciduous broad-leaved forests (DB), Coniferous forests (CF), Coniferous broad-leaved mixed forests (CB), and Evergreen broad-leaved forests (EB).

| Sample ID      | TOC(g/kg)     | TN(g/kg)   | C: N ratio   | pH         | Moisture (%) |
|----------------|---------------|------------|--------------|------------|--------------|
| <b>0-10cm</b>  |               |            |              |            |              |
| AL             | 18.04±2.12c   | 0.97±0.08a | 18.65±0.62a  | 5.39±0.25a | 29.20±2.81a  |
| DB             | 33.04±7.18bc  | 2.29±1.20a | 17.33±13.05a | 5.59±0.39a | 26.52±1.73a  |
| CF             | 57.80±24.39ab | 3.04±1.25a | 20.86±11.97a | 4.87±0.48a | 25.84±3.56a  |
| CB             | 33.25±14.89bc | 1.25±0.09a | 26.79±7.40a  | 4.77±0.29a | 25.89±4.98a  |
| EB             | 79.14±4.42a   | 2.62±0.80a | 32.59±11.85a | 4.68±0.93a | 27.59±6.15a  |
| <b>10-30cm</b> |               |            |              |            |              |
| AL             | 16.33±1.20b   | 0.86±0.06a | 19.12±2.66a  | 5.33±0.20a | 21.51±1.28a  |
| DB             | 24.94±10.44b  | 2.07±0.56a | 13.47±8.63a  | 5.37±0.41a | 23.86±0.84a  |
| CF             | 29.74±3.92b   | 2.15±0.31a | 14.04±2.78a  | 4.98±0.22a | 20.41±2.20a  |
| CB             | 25.00±3.92b   | 1.17±0.54a | 24.45±13.11a | 4.77±0.18a | 21.93±5.21a  |
| EB             | 55.73±5.02a   | 2.65±1.45a | 27.67±18.52a | 4.96±0.69b | 26.04±5.07a  |

The different letters indicate significant differences between different succession period ( $P < 0.05$ ).

**Table S2** Effects of forest succession on the composition of fungal and bacterial communities. Abandoned lands (AL), Deciduous broad-leaved forests (DB), Coniferous forests (CF), Coniferous broad-leaved mixed forests (CB), and Evergreen broad-leaved forests (EB).

|                 | Group | Variation (R) | P_value | P_adj_BH    | Sig |
|-----------------|-------|---------------|---------|-------------|-----|
| <b>Bacteria</b> | AL/DB | 0.8444444444  | 0.003   | 0.006       | **  |
|                 | AL/CF | 0.998148148   | 0.003   | 0.006       | **  |
|                 | AL/CB | 1             | 0.006   | 0.0075      | **  |
|                 | AL/EB | 1             | 0.005   | 0.007142857 | **  |
|                 | DB/CB | 0.766666667   | 0.004   | 0.006666667 | **  |
|                 | DB/EB | 1             | 0.003   | 0.006       | **  |
|                 | DB/NF | 1             | 0.003   | 0.006       | **  |
|                 | CF/CB | 0.448148148   | 0.002   | 0.006       | **  |
|                 | CF/EB | 0.448148148   | 0.007   | 0.007777778 | **  |
|                 | CB/EB | 0.227777778   | 0.062   | 0.062       |     |
| <b>Fungi</b>    | AL/DB | 0.905555556   | 0.004   | 0.008       | **  |
|                 | AL/CF | 1             | 0.001   | 0.0075      | **  |
|                 | AL/CB | 1             | 0.002   | 0.0075      | **  |

---

|       |             |       |             |    |
|-------|-------------|-------|-------------|----|
| AL/EB | 1           | 0.006 | 0.008571429 | ** |
| DB/CB | 0.8         | 0.003 | 0.0075      | ** |
| DB/NF | 0.974074074 | 0.005 | 0.008333333 | ** |
| DB/NF | 0.727777778 | 0.003 | 0.0075      | ** |
| CF/CB | 0.3         | 0.012 | 0.013333333 | *  |
| CF/EB | 0.272222222 | 0.008 | 0.01        | *  |
| CB/EB | 0.131481481 | 0.107 | 0.107       |    |

---

Significance was tested with a permutational multivariate analysis of variance (999 permutations)

using Bray–Curtis dissimilarity matrices for the two communities. \*\*\*  $P < 0.001$ ; \*\*  $P < 0.01$ ; \*  $P$

$< 0.05$ .
